# Supplementary material for: Type 2 Diabetes Risk and Lipid Metabolism Related to the Pleiotropic Effects of an ABCB1 Variant: A Chinese Family-Based Cohort Study
Source: MDPI journal article supplement (doi:10.3390/metabo12090875), 2022-09-16
Supplement: s1 [file s1]

## Supplementary Files

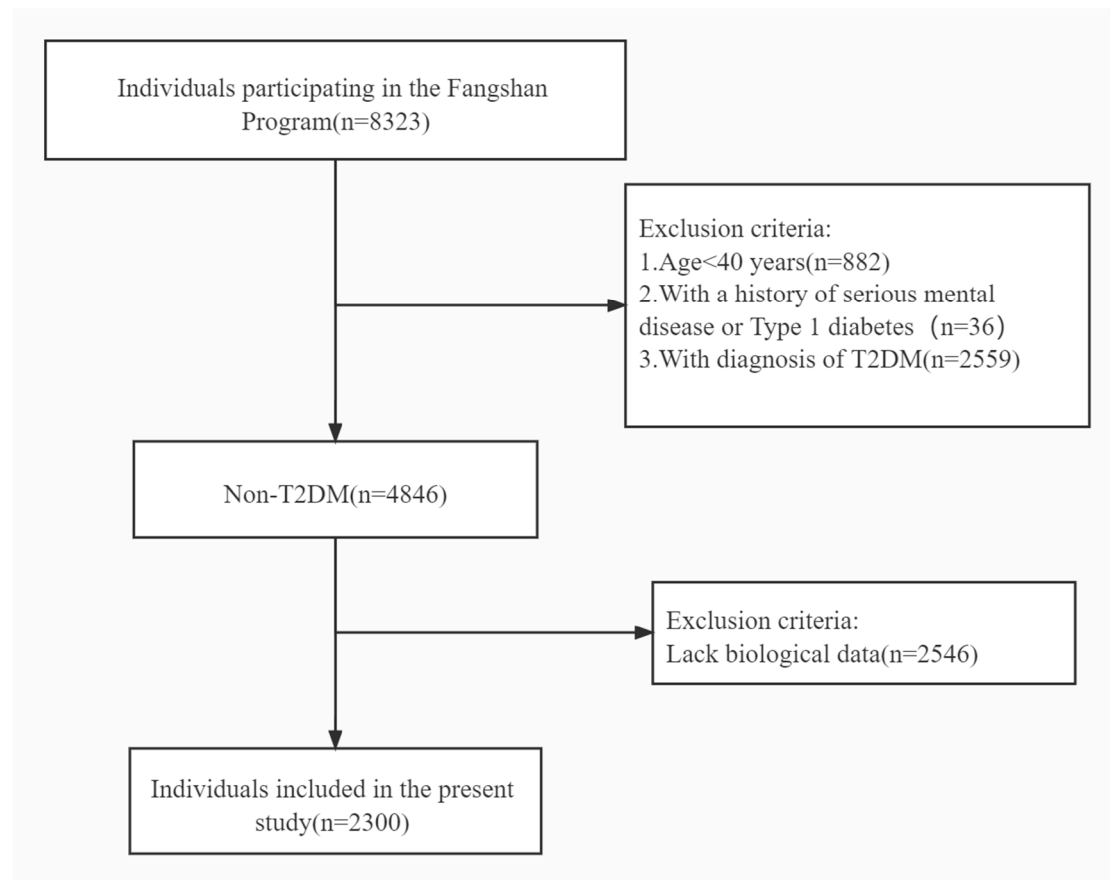

Figure S1. The flow chart of the study population selection.

**Table S1.** Baseline Lipid Parameters and the risk of T2DM.

| Variables | $\beta$ (SE)  | PC (%) (95% CI)      | P value |
|-----------|---------------|----------------------|---------|
| TC        | 0.017(0.065)  | 1.72(-10.45-15.54)   | 0.796   |
| TG        | 0.110(0.038)  | 11.63(3.42-20.26)    | 0.003   |
| LDL-C     | -0.021(0.082) | -2.08(-16.62-15.00)  | 0.796   |
| HDL-C     | -0.480(0.206) | -38.12(-58.68--7.34) | 0.020   |
| Apo-A     | 0.120(0.191)  | 12.75(-22.46-63.95)  | 0.529   |
| Apo-B     | 0.061(0.006)  | 6.29(5.05-7.53)      | 0.008   |

$\beta$ : estimate; SE: standard error; PC: percentage change; CI: confidence interval; TC: total cholesterol; TG: triglyceride; LDL-C: low-density lipoprotein cholesterol; HDL-C: high-density lipoprotein cholesterol; Apo-A: apolipoprotein A; Apo-B: apolipoprotein B; T2DM: type 2 diabetes mellitus. Notes: All models were adjusted for age, sex, smoking and drinking status, hypertension, coronary heart disease, and body mass index. P values <0.05 were shown in bold.

**Table S2.** HRs (95% CIs) for different lipid parameters and incident T2DM by ABCB1 rs4148727.

| Variables                | $\beta$ (SE)  | PC (%) (95% CI)     | P value |
|--------------------------|---------------|---------------------|---------|
| <b>BMI&lt;24(n=702)</b>  |               |                     |         |
| Lipid parameters         |               |                     |         |
| TC                       | 0.045(0.081)  | 4.60(-10.75-22.60)  | 0.575   |
| TG                       | -0.061(0.073) | -5.92(-18.46-8.55)  | 0.399   |
| LDL-C                    | 0.015(0.066)  | 1.51(-10.81-15.53)  | 0.820   |
| HDL-C                    | 0.045(0.030)  | 4.60(-1.37-10.94)   | 0.140   |
| Apo-A                    | 0.039(0.030)  | 3.98(-1.96-10.27)   | 0.196   |
| Apo-B                    | 0.006(0.021)  | 0.60(-3.46-4.83)    | 0.768   |
| T2DM                     | 0.099(0.256)  | 10.41(-33.15-82.35) | 0.698   |
| <b>BMI≥24(n=1598)</b>    |               |                     |         |
| Lipid parameters         |               |                     |         |
| TC                       | 0.123(0.053)  | 13.088(1.93-25.47)  | 0.022   |
| TG                       | 0.246(0.084)  | 27.890(8.48-50.78)  | 0.003   |
| LDL-C                    | 0.076(0.042)  | 7.896(-0.63-17.15)  | 0.071   |
| HDL-C                    | 0.010(0.017)  | 0.000(-3.28-3.39)   | 0.993   |
| Apo-A                    | 0.035(0.018)  | 3.562(-0.03-7.28)   | 0.047   |
| Apo-B                    | 0.010(0.013)  | 1.005(-1.54-3.61)   | 0.467   |
| T2DM                     | 0.321(0.126)  | 37.851(7.69-76.47)  | 0.011   |
| <b>Non-smoke(n=1188)</b> |               |                     |         |
| Lipid parameters         |               |                     |         |
| TC                       | 0.153(0.062)  | 16.532(3.20-31.59)  | 0.014   |
| TG                       | 0.213(0.083)  | 23.738(5.16-45.60)  | 0.010   |
| LDL-C                    | 0.087(0.049)  | 9.090(-0.90-20.09)  | 0.077   |
| HDL-C                    | 0.028(0.021)  | 2.840(-1.31-7.16)   | 0.169   |
| Apo-A                    | 0.049(0.021)  | 5.022(0.79-9.44)    | 0.020   |
| Apo-B                    | 0.015(0.016)  | 1.511(-1.62-4.75)   | 0.349   |
| T2DM                     | 0.230(0.142)  | 25.860(-4.72-66.25) | 0.106   |
| <b>Smoke(n=1083)</b>     |               |                     |         |
| Lipid parameters         |               |                     |         |
| TC                       | 0.035(0.064)  | 3.562(-8.65-17.40)  | 0.587   |
| TG                       | 0.108(0.095)  | 11.405(-7.52-34.21) | 0.255   |
| LDL-C                    | 0.017(0.051)  | 1.715(-7.96-12.41)  | 0.744   |
| HDL-C                    | -0.004(0.022) | -0.399(-4.60-3.99)  | 0.484   |
| Apo-A                    | 0.021(0.022)  | 2.122(-2.19-6.62)   | 0.358   |
| Apo-B                    | -0.002(0.016) | -0.200(-3.28-2.98)  | 0.889   |
| T2DM                     | 0.376(0.188)  | 45.645(0.76-110.54) | 0.046   |
| <b>Non-drink(n=1280)</b> |               |                     |         |
| Lipid parameters         |               |                     |         |
| TC                       | 0.117(0.058)  | 12.412(0.33-25.95)  | 0.044   |
| TG                       | 0.090(0.070)  | 9.417(-4.61-25.51)  | 0.197   |
| LDL-C                    | 0.058(0.048)  | 5.971(-3.54-16.43)  | 0.222   |
| HDL-C                    | 0.028(0.019)  | 2.840(-0.92-6.74)   | 0.149   |

|                     |               |                     |       |
|---------------------|---------------|---------------------|-------|
| Apo-A               | 0.047(0.020)  | 4.812(0.78-9.01)    | 0.021 |
| Apo-B               | 0.009(0.015)  | 0.904(-2.02-3.92)   | 0.567 |
| T2DM                | 0.275(0.143)  | 31.653(-0.53-74.24) | 0.054 |
| <b>Drink(n=985)</b> |               |                     |       |
| Lipid parameters    |               |                     |       |
| TC                  | 0.070(0.069)  | 7.251(-6.32-22.78)  | 0.312 |
| TG                  | 0.240(0.113)  | 27.125(1.87-58.64)  | 0.034 |
| LDL-C               | 0.047(0.053)  | 4.812(-5.53-16.29)  | 0.375 |
| HDL-C               | -0.004(0.024) | -0.399(-4.98-4.40)  | 0.878 |
| Apo-A               | 0.023(0.023)  | 2.327(-2.18-7.05)   | 0.331 |
| Apo-B               | 0.005(0.017)  | 0.501(-2.79-3.91)   | 0.784 |
| T2DM                | 0.293(0.187)  | 34.044(-7.09-93.39) | 0.119 |

β, estimate; SE, standard error; PC, percentage change; CI, confidence interval; TC, total cholesterol; TG, triglyceride; HDL-C, high density lipoprotein cholesterol; LDL-C, low density lipoprotein cholesterol; Apo-A, apolipoprotein-A; Apo-B, apolipoprotein-B; T2DM, type 2 diabetes mellites.

**Notes:** All models were adjusted for age, sex, smoking or drinking status, hypertension, coronary heart disease, and body mass index. P values<0.05 were shown in bold

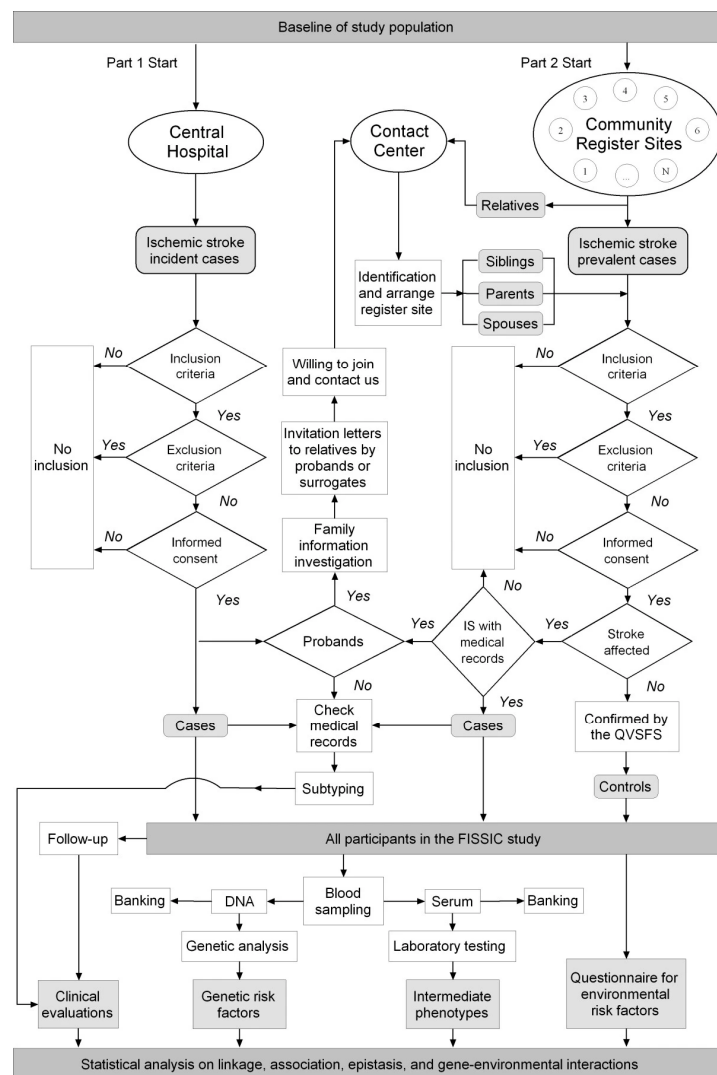

Figure S2. The original recruitment procedures in the supplement files

Tang, X., Hu, Y., Chen, D. et al. The Fangshan/Family-based Ischemic Stroke Study In China (FISSIC) protocol. BMC Med Genet 8, 60 (2007). <https://doi.org/10.1186/1471-2350-8-60>
